# Supplementary material
Source: MDPI journal article supplement (https://www.mdpi.com/1999-4907/14/8/1634)
Supplement: s1 [file s1]

**Table S1.** Soil chemical of field soils that support early-, middle-, and later-successional species.

| Soil types | SOC (g kg <sup>-1</sup> ) | TN (g kg <sup>-1</sup> ) | TP (g kg <sup>-1</sup> ) | SAP (g kg <sup>-1</sup> ) | SAN (g kg <sup>-1</sup> ) |
|------------|---------------------------|--------------------------|--------------------------|---------------------------|---------------------------|
| Early      | 5.23±0.02a                | 0.74±0.01a               | 0.58±0.01a               | 2.50±0.08a                | 8.57±0.05a                |
| Middle     | 4.48±0.01b                | 0.51±0.02c               | 0.56±0.00a               | 1.90±0.03c                | 6.29±0.06c                |
| Later      | 5.18±0.01a                | 0.64±0.01b               | 0.46±0.01b               | 2.20±0.03b                | 8.14±0.04b                |

Different letters indicate significant differences in soil chemicals among the three soil types based on Duncan’s post hoc test ( $p < 0.05$ ). SOC, soil organic carbon; TN, soil total nitrogen; TP, soil total phosphorus; SAP, soil available phosphorus; SAN, soil available nitrogen.

**Table S2.** Soil microbial biomass and enzyme activity of field soils that support early-, middle-, and late-successional species.

| Soil types | BG<br>( $\mu\text{mol h}^{-1} \text{g}^{-1}$ ) | CBH<br>( $\mu\text{mol h}^{-1} \text{g}^{-1}$ ) | NAG<br>( $\mu\text{mol h}^{-1} \text{g}^{-1}$ ) | LAP<br>( $\mu\text{mol h}^{-1} \text{g}^{-1}$ ) | AP<br>( $\mu\text{mol h}^{-1} \text{g}^{-1}$ ) | MBC<br>( $\text{mg kg}^{-1}$ ) | MBN<br>( $\text{mg kg}^{-1}$ ) |
|------------|------------------------------------------------|-------------------------------------------------|-------------------------------------------------|-------------------------------------------------|------------------------------------------------|--------------------------------|--------------------------------|
| Early      | 3.10 $\pm$ 0.06a                               | 0.25 $\pm$ 0.002a                               | 0.14 $\pm$ 0.004a                               | 4.11 $\pm$ 0.10a                                | 26.20 $\pm$ 0.88a                              | 145.69 $\pm$ 2.07a             | 33.15 $\pm$ 0.32a              |
| Middle     | 2.68 $\pm$ 0.01c                               | 0.21 $\pm$ 0.010b                               | 0.09 $\pm$ 0.002c                               | 3.54 $\pm$ 0.04b                                | 20.92 $\pm$ 0.85b                              | 93.38 $\pm$ 1.90c              | 29.54 $\pm$ 0.45b              |
| Later      | 2.91 $\pm$ 0.01b                               | 0.23 $\pm$ 0.004b                               | 0.11 $\pm$ 0.001b                               | 3.68 $\pm$ 0.14ab                               | 23.75 $\pm$ 0.28ab                             | 115.39 $\pm$ 0.95b             | 28.45 $\pm$ 0.18b              |

Different letters indicate significant differences in soil microbial biomass and enzyme activity among the three soil types based on Duncan's post hoc test ( $p < 0.05$ ). BG,  $\beta$ -1,4-glucosidase; CBH, cellobiose hydrolase; NAG,  $\beta$ -1,4-acetyl-glucosamine glycosidase; LAP, leucine aminopeptidase; AP, phosphatase; MBC, microbial biomass carbon; MBN, microbial biomass nitrogen.

**Table S3.** F and p values of independent factors (plant growth period (P), species (S), and soil types (ST)) and their interactions to various parameters studied by a three-way ANOVA.

|               | Plant growth period (P) |        | Species (S) |        | Soil types (ST) |        | P×S   |        | P×ST  |        | S×ST  |        | P×S×ST |        |
|---------------|-------------------------|--------|-------------|--------|-----------------|--------|-------|--------|-------|--------|-------|--------|--------|--------|
|               | F                       | p      | F           | p      | F               | p      | F     | p      | F     | p      | F     | p      | F      | p      |
| Shoot biomass | 172.10                  | <0.001 | 3.45        | 0.040  | 71.21           | <0.001 | 14.29 | <0.001 | 16.38 | <0.001 | 3.13  | 0.023  | 5.17   | 0.002  |
| Root biomass  | 0.82                    | 0.375  | 52.60       | <0.001 | 27.92           | <0.001 | 1.25  | 0.297  | 0.50  | 0.612  | 5.58  | <0.001 | 0.61   | 0.656  |
| SOC           | 329.17                  | <0.001 | 69.55       | <0.001 | 87.04           | <0.001 | 53.09 | <0.001 | 0.96  | 0.391  | 8.59  | <0.001 | 6.37   | <0.001 |
| TN            | 8.70                    | 0.005  | 2.32        | 0.110  | 36.13           | <0.001 | 0.36  | 0.700  | 1.84  | 0.171  | 0.15  | 0.963  | 1.10   | 0.366  |
| TP            | 325.26                  | <0.001 | 0.03        | 0.972  | 45.12           | <0.001 | 61.43 | <0.001 | 9.57  | <0.001 | 0.83  | 0.512  | 1.42   | 0.242  |
| SAP           | 63.16                   | <0.001 | 0.64        | 0.530  | 10.44           | <0.001 | 1.10  | 0.342  | 1.47  | 0.240  | 1.04  | 0.396  | 0.67   | 0.615  |
| SAN           | 31.41                   | <0.001 | 0.95        | 0.394  | 0.97            | 0.386  | 0.42  | 0.660  | 4.48  | 0.017  | 0.44  | 0.779  | 1.05   | 0.390  |
| MBC           | 28.77                   | <0.001 | 38.46       | <0.001 | 163.80          | <0.001 | 6.02  | 0.005  | 2.76  | 0.074  | 5.58  | <0.001 | 0.52   | 0.719  |
| MBN           | 57.52                   | <0.001 | 17.96       | <0.001 | 82.54           | <0.001 | 0.42  | 0.661  | 8.77  | <0.001 | 5.70  | <0.001 | 0.69   | 0.601  |
| BG            | 3.57                    | 0.065  | 38.14       | <0.001 | 124.19          | <0.001 | 39.20 | <0.001 | 20.85 | <0.001 | 3.12  | 0.025  | 2.81   | 0.036  |
| CBH           | 0.17                    | 0.681  | 36.35       | <0.001 | 114.21          | <0.001 | 25.84 | <0.001 | 1.96  | 0.153  | 3.11  | 0.024  | 0.93   | 0.454  |
| NAG           | 0.05                    | 0.820  | 77.36       | <0.001 | 17.62           | <0.001 | 19.59 | <0.001 | 0.61  | 0.547  | 1.63  | 0.182  | 0.75   | 0.566  |
| LAP           | 489.37                  | <0.001 | 14.51       | <0.001 | 18.00           | <0.001 | 14.43 | <0.001 | 5.54  | 0.007  | 1.64  | 0.181  | 2.57   | 0.045  |
| AP            | 22.10                   | <0.001 | 16.36       | <0.001 | 64.43           | <0.001 | 38.96 | <0.001 | 0.49  | 0.616  | 1.23  | 0.312  | 0.79   | 0.534  |
| STBC          | 103.17                  | <0.001 | 83.05       | <0.001 | 117.56          | <0.001 | 2.34  | 0.108  | 1.07  | 0.351  | 13.88 | <0.001 | 4.66   | 0.003  |
| STBN          | 52.84                   | <0.001 | 4.75        | 0.013  | 73.03           | <0.001 | 1.27  | 0.292  | 0.36  | 0.698  | 10.25 | <0.001 | 2.79   | 0.037  |
| STBP          | 220.97                  | <0.001 | 54.54       | <0.001 | 87.90           | <0.001 | 35.98 | <0.001 | 19.71 | <0.001 | 6.45  | <0.001 | 5.99   | <0.001 |
| RTBC          | 30066.30                | <0.001 | 4.55        | 0.016  | 64.54           | <0.001 | 4.93  | 0.011  | 63.90 | <0.001 | 5.58  | <0.001 | 5.55   | <0.001 |
| RTBN          | 15302.10                | <0.001 | 3.68        | 0.033  | 15.19           | <0.001 | 4.04  | 0.024  | 10.76 | <0.001 | 0.36  | 0.834  | 0.33   | 0.856  |
| RTBP          | 3372.34                 | <0.001 | 3.19        | 0.050  | 34.74           | <0.001 | 3.16  | 0.052  | 22.81 | <0.001 | 1.00  | 0.419  | 0.75   | 0.565  |

SOC, soil organic carbon; TN, soil total nitrogen; TP, soil total phosphorus; SAP, soil available phosphorus; SAN, soil available nitrogen. MBC, microbial biomass carbon; MBN, microbial biomass nitrogen. BG,  $\beta$ -1,4-glucosidase; CBH, cellobiose hydrolase; NAG,  $\beta$ -1,4-acetyl-glucosamine glycosidase; LAP, leucine aminopeptidase; AP, phosphatase. STBC, shoot biomass carbon; STBN, shoot biomass nitrogen; STBP, shoot biomass phosphorus. RTBC, root biomass carbon; RTBN, root biomass nitrogen; RTBP, root biomass phosphorus.

**Table S4.** T-tests analysis parameters of plant height during the plant growth period of *Artemisia sacrorum*, *Artemisia capillaris*, and *Artemisia giraldii*.

| Soil types | <i>Artemisia sacrorum</i> |     |      | <i>Artemisia capillaris</i> |     |      | <i>Artemisia giraldii</i> |     |      |
|------------|---------------------------|-----|------|-----------------------------|-----|------|---------------------------|-----|------|
|            | 60d                       | 90d | 120d | 60d                         | 90d | 120d | 60d                       | 90d | 120d |
| Early      | -                         | -   | -    | **                          | **  | ***  | -                         | *   | *    |
| Middle     | **                        | **  | **   | -                           | *** | ***  | -                         | *   | -    |
| Later      | *                         | **  | *    | **                          | *** | ***  | **                        | -   | -    |

\*\*\*p < 0.001, \*\*p < 0.01, \*p < 0.05. -, did not reach the level of significant difference.

**Table S5.** T-tests analysis parameters of soil chemicals during growth of *Artemisia sacrorum*, *Artemisia capillaris*, and *Artemisia giraldii*.

| Soil types | <i>Artemisia sacrorum</i> |    |     |     |     | <i>Artemisia capillaris</i> |    |     |     |     | <i>Artemisia giraldii</i> |    |     |     |     |
|------------|---------------------------|----|-----|-----|-----|-----------------------------|----|-----|-----|-----|---------------------------|----|-----|-----|-----|
|            | SOC                       | TN | TP  | SAP | SAN | SOC                         | TN | TP  | SAP | SAN | SOC                       | TN | TP  | SAP | SAN |
| Early      | ***                       | -  | *** | *** | *** | ***                         | ** | *** | *** | *** | ***                       | -  | *** | *** | *** |
| Middle     | ***                       | -  | *** | *** | -   | -                           | -  | *** | *** | *** | ***                       | *  | *** | *** | -   |
| Later      | ***                       | -  | *** | *   | -   | -                           | -  | *   | **  | *** | ***                       | ** | -   | *** | *** |

\*\*\*p < 0.001, \*\*p < 0.01, \*p < 0.05. -, did not reach the level of significant difference. SOC, soil organic carbon; TN, soil total nitrogen; TP, soil total phosphorus; SAP, soil available phosphorus; SAN, soil available nitrogen.

**Table S6.** T-tests analysis parameters of soil enzyme activity during the plant growth of *Artemisia sacrorum*, *Artemisia capillaris*, and *Artemisia giraldii*.

| Soil types | <i>Artemisia sacrorum</i> |     |     |     |    | <i>Artemisia capillaris</i> |     |     |     |     | <i>Artemisia giraldii</i> |     |     |     |     |
|------------|---------------------------|-----|-----|-----|----|-----------------------------|-----|-----|-----|-----|---------------------------|-----|-----|-----|-----|
|            | BG                        | CBH | NAG | LAP | AP | BG                          | CBH | NAG | LAP | AP  | BG                        | CBH | NAG | LAP | AP  |
| Early      | ***                       | *** | *** | *** | ** | *                           | -   | *   | *** | *** | -                         | -   | -   | *** | *** |
| Middle     | ***                       | *** | *** | *** | ** | **                          | -   | -   | *** | *** | -                         | *   | **  | *** | *** |
| Later      | ***                       | **  | *** | *** | *  | *                           | -   | *** | *** | -   | -                         | **  | -   | *** | *** |

\*\*\*p < 0.001, \*\*p < 0.01, \*p < 0.05. -, did not reach the level of significant difference. BG,  $\beta$ -1,4-glucosidase; CBH, cellobiose hydrolase; NAG,  $\beta$ -1,4-acetyl-glucosamine glycosidase; LAP, leucine aminopeptidase; AP, phosphatase.

**Table S7.** T-tests analysis parameters of soil microbial biomass during the plant growth of *Artemisia sacrorum*, *Artemisia capillaris*, and *Artemisia giraldii*.

| Soil types | <i>Artemisia sacrorum</i> |     | <i>Artemisia capillaris</i> |     | <i>Artemisia giraldii</i> |     |
|------------|---------------------------|-----|-----------------------------|-----|---------------------------|-----|
|            | MBC                       | MBN | MBC                         | MBN | MBC                       | MBN |
| Early      | **                        | -   | *                           | -   | *                         | -   |
| Middle     | -                         | -   | -                           | *   | -                         | -   |
| Later      | **                        | *   | *                           | *   | -                         | **  |

\*\*\*p < 0.001, \*\*p < 0.01, \*p < 0.05. -, did not reach the level of significant difference. MBC, microbial biomass carbon; MBN, microbial biomass nitrogen.

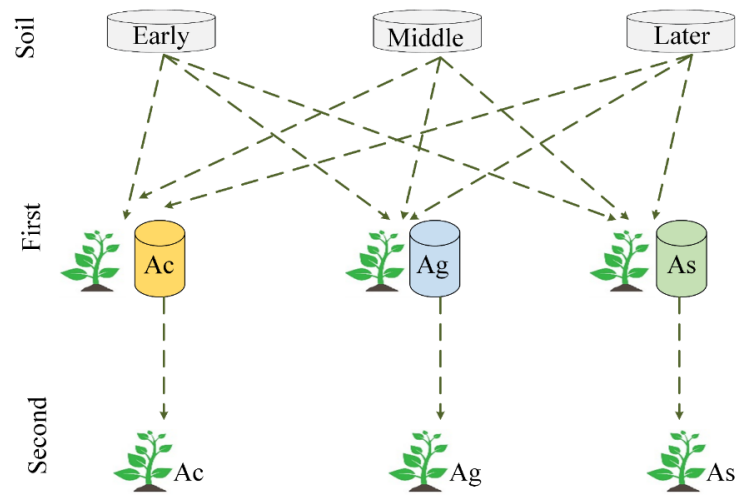

**Figure S1.** Plant-soil feedback experiment design of companion species *Artemisia sacrorum* (As) *Artemisia capillaris* (Ac), and *Artemisia giraldii* (Ag).
